# Supplementary material for: Definition of the Post-COVID syndrome using a symptom-based Post-COVID score in a prospective, multi-center, cross-sectoral cohort of the German National Pandemic Cohort Network (NAPKON)
Source: Springer Nature journal article supplement (doi:10.1007/s15010-024-02226-9), 2024-04-08
Supplement: MOESM1 [file 26955792]

Journal: Infection

Supplementary material to

**Definition of the Post-COVID syndrome using a symptom-based Post-COVID score in a prospective, multi-center, cross-sectoral cohort of the German National Pandemic Cohort Network (NAPKON)**

Katharina S. Appel<sup>1,2\*</sup>, Carolin Nürnberger<sup>3,4\*</sup>, Thomas Bahmer<sup>5,6</sup>, Christian Förster<sup>7</sup>, Maria Cristina Polidori<sup>8,9</sup>, Mirjam Kohls<sup>3</sup>, Tanja Kraus<sup>7</sup>, Nora Hettich-Damm<sup>10</sup>, Julia Petersen<sup>10</sup>, Sabine Blaschke<sup>11</sup>, Isabel Bröhl<sup>2</sup>, Jana Butzmann<sup>12</sup>, Hiwa Dashti<sup>13</sup>, Jürgen Deckert<sup>14</sup>, Michael Dreher<sup>15</sup>, Karin Fiedler<sup>1,2</sup>, Carsten Finke<sup>16</sup>, Ramsia Geisler<sup>1,2</sup>, Frank Hanses<sup>17</sup>, Sina M. Hopff<sup>18</sup>, Björn-Erik O. Jensen<sup>19</sup>, Margarethe Konik<sup>20</sup>, Kristin Lehnert<sup>21,22</sup>, Susana M. Nunes de Miranda<sup>2</sup>, Lazar Mitrov<sup>18</sup>, Olga Miljukov<sup>3,4</sup>, Jens-Peter Reese<sup>3,4</sup>, Gernot Rohde<sup>23</sup>, Margarete Scherer<sup>1</sup>, Kristin Tausche<sup>24</sup>, Johannes J. Tebbe<sup>25</sup>, Jörg Janne Vehreschild<sup>1,2,26</sup>, Florian Voit<sup>27</sup>, Patricia Wagner<sup>2</sup>, Martin Weigl<sup>28</sup>, Christina Lemhöfer<sup>29</sup> on behalf of the NAPKON Study Group

\*Contributed equally

1 Goethe University Frankfurt, University Hospital, Center for Internal Medicine, Medical Department 2 (Hematology/Oncology and Infectious Diseases), Frankfurt, Germany

2 University of Cologne, Faculty of Medicine and University Hospital Cologne, Department I of Internal Medicine, Cologne, Germany

3 University of Würzburg, Institute for Clinical Epidemiology and Biometry, Würzburg, Germany

4 University Hospital Würzburg, Institute for medical Data Science, Würzburg, Germany

5 Internal Medicine Department I, University Hospital Schleswig-Holstein Campus Kiel, Kiel, Germany

6 Airway Research Center North (ARCN), German Center for Lung Research (DZL), Grosshansdorf, Germany

7 Institute of General Practice and Interprofessional Care, University Hospital Tübingen, Tübingen, Germany

8 Department II of Internal Medicine and Center for Molecular Medicine Cologne, University of Cologne, Faculty of Medicine and University Hospital Cologne, Cologne, Germany

9 CECAD, University of Cologne, Faculty of Medicine and University Hospital Cologne, Cologne, Germany

10 Department of Psychosomatic Medicine and Psychotherapy, University Medical Center Mainz, Mainz, Germany

11 Emergency Department, University Medical Center Goettingen, Göttingen, Germany

12 Institute of Medical Microbiology and Hospital Hygiene, University Hospital Magdeburg, Medical Faculty, Otto-von-Guericke University Magdeburg, Magdeburg, Germany

13 Practice for general medicine Dashti, Eberswalde, Germany

14 University Hospital Würzburg, Center of Mental Health, Department of Psychiatry, Psychosomatics and Psychotherapy, Würzburg, Germany

15 Department of Pneumology and Intensive Care Medicine, University Hospital RWTH Aachen, Aachen, Germany

16 Department of Neurology, Charité Berlin, Berlin, Germany

17 Emergency Department and Department for Infection Control an Infectious Diseases, University Hospital Regensburg, Regensburg, Germany

18 University of Cologne, Faculty of Medicine and University Hospital Cologne, Department I of Internal Medicine, Center for Integrated Oncology Aachen Bonn Cologne Duesseldorf, Cologne, Germany

19 Department of Gastroenterology, Hepatology and Infectious Diseases, Düsseldorf University Hospital, Medical Faculty, Heinrich Heine University, Düsseldorf, Germany

20 Department of Infectious Diseases, West German Centre of Infectious Diseases, University Medicine Essen, University Duisburg-Essen, Essen, Germany

21 DZHK (German Center for Cardiovascular Research), University Medicine Greifswald, Greifswald, Germany

22 Department of Internal Medicine B, University Medicine Greifswald, Greifswald, Germany

23 Goethe University Frankfurt, University Hospital, Medical Clinic I, Department of Respiratory Medicine, Frankfurt/Main, Germany

24 Department of Internal Medicine I, University Hospital Carl Gustav Carus TU Dresden, Dresden, Germany

25 Klinikum Lippe, Department of Gastroenterology and Infectious Diseases, Lippe, Germany

26 German Centre for Infection Research (DZIF), partner site Bonn-Cologne, Cologne, Germany

27 Department of Internal Medicine II, University hospital rechts der Isar, Technical University of Munich, School of Medicine, Munich, Germany

28 Department of Orthopaedics and Trauma Surgery, Musculoskeletal University Center Munich (MUM), University Hospital, LMU Munich, Munich, Germany

29 Institute of Physical and Rehabilitation Medicine, Jena University Hospital/Friedrich-Schiller-University Jena, Jena, Germany

**Corresponding author**

Katharina S. Appel

Goethe University Frankfurt, University Hospital, Center for Internal Medicine, Medical Department 2 (Hematology/Oncology and Infectious Diseases), Frankfurt, Germany

Email: [appel@med.uni-frankfurt.de](mailto:appel@med.uni-frankfurt.de)

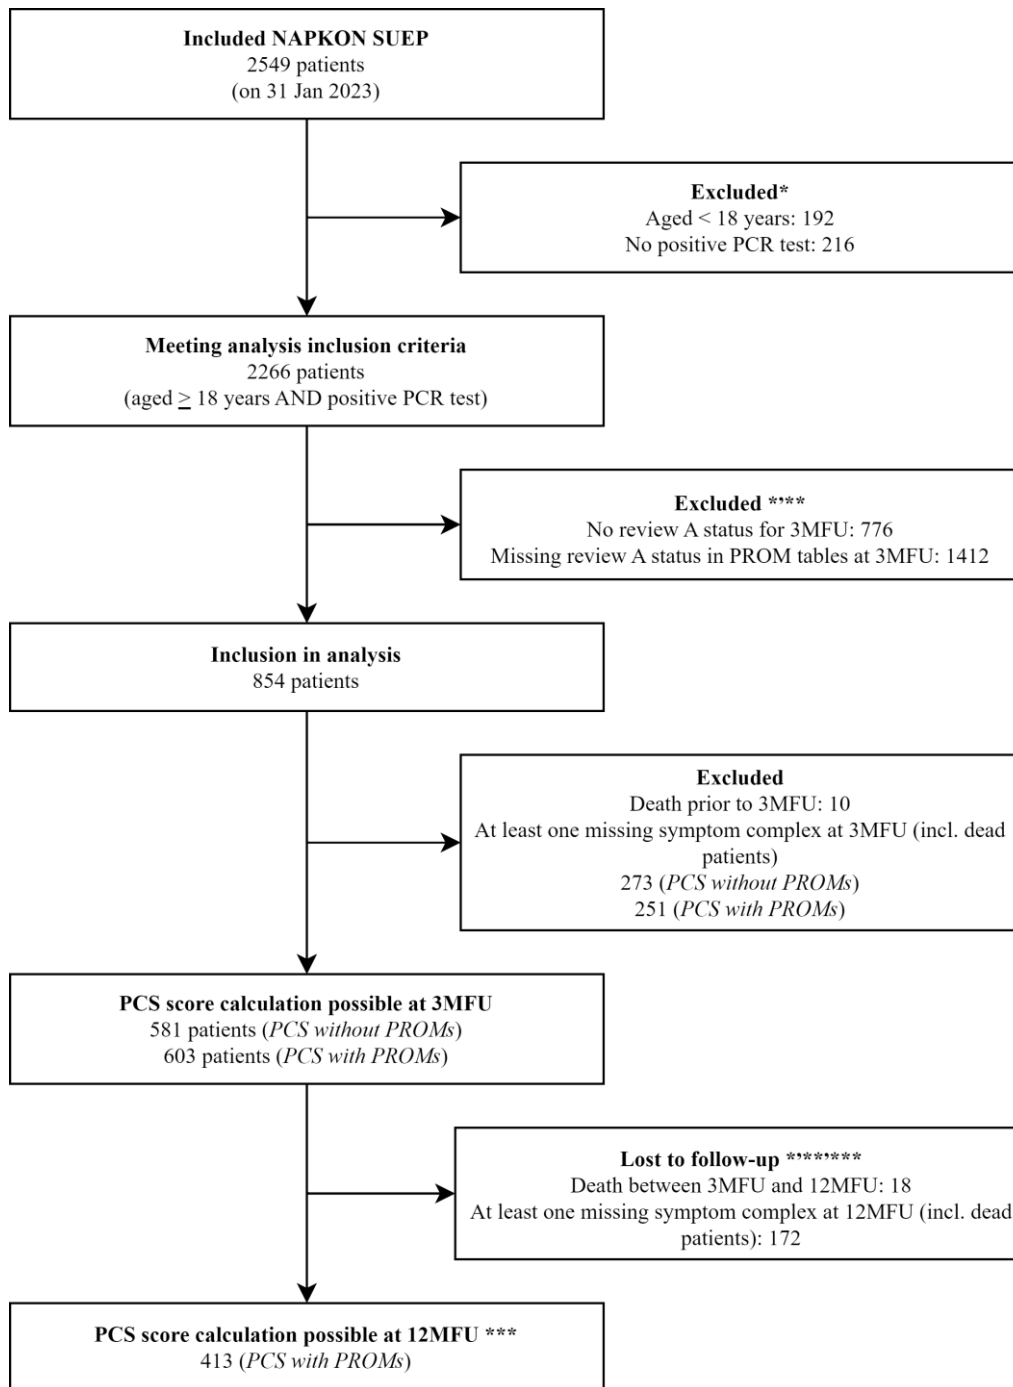

**Figure S1:** Study Flow Chart.

\* at least one criteria was not present; \*\* review A status means that a monitoring has been performed at the study sites, which recruited the patient and entered study data; this is a standard data export criterion for NAPKON data; \*\*\* PCS at 12MFU was only calculated for patients with PCS including PROMs at 3MFU

**File S1:** STROBE Statement—Checklist of items that should be included in reports of cohort studies.

|                              | <b>Item No</b> | <b>Recommendation</b>                                                                                                                                                                | <b>Page No</b> |
|------------------------------|----------------|--------------------------------------------------------------------------------------------------------------------------------------------------------------------------------------|----------------|
| <b>Title and abstract</b>    | 1              | (a) Indicate the study's design with a commonly used term in the title or the abstract                                                                                               | 1              |
|                              |                | (b) Provide in the abstract an informative and balanced summary of what was done and what was found                                                                                  | 2              |
| <b>Introduction</b>          |                |                                                                                                                                                                                      |                |
| Background/rationale         | 2              | Explain the scientific background and rationale for the investigation being reported                                                                                                 | 3              |
| Objectives                   | 3              | State specific objectives, including any prespecified hypotheses                                                                                                                     | 3              |
| <b>Methods</b>               |                |                                                                                                                                                                                      |                |
| Study design                 | 4              | Present key elements of study design early in the paper                                                                                                                              | 4              |
| Setting                      | 5              | Describe the setting, locations, and relevant dates, including periods of recruitment, exposure, follow-up, and data collection                                                      | 4              |
| Participants                 | 6              | (a) Give the eligibility criteria, and the sources and methods of selection of participants. Describe methods of follow-up                                                           | 4              |
|                              |                | (b) For matched studies, give matching criteria and number of exposed and unexposed                                                                                                  | /              |
| Variables                    | 7              | Clearly define all outcomes, exposures, predictors, potential confounders, and effect modifiers. Give diagnostic criteria, if applicable                                             | 4-5            |
| Data sources/<br>measurement | 8*             | For each variable of interest, give sources of data and details of methods of assessment (measurement). Describe comparability of assessment methods if there is more than one group | 4-5            |
| Bias                         | 9              | Describe any efforts to address potential sources of bias                                                                                                                            | 9              |
| Study size                   | 10             | Explain how the study size was arrived at                                                                                                                                            | 4-5            |
| Quantitative variables       | 11             | Explain how quantitative variables were handled in the analyses. If applicable, describe which groupings were chosen and why                                                         | 5              |
| Statistical methods          | 12             | (a) Describe all statistical methods, including those used to control for confounding                                                                                                | 5              |
|                              |                | (b) Describe any methods used to examine subgroups and interactions                                                                                                                  | 5              |
|                              |                | (c) Explain how missing data were addressed                                                                                                                                          | 5              |
|                              |                | (d) If applicable, explain how loss to follow-up was addressed                                                                                                                       | 4              |
|                              |                | (e) Describe any sensitivity analyses                                                                                                                                                | 6              |

**File S1:** continued

|                          |     |                                                                                                                                                                                                              |       |
|--------------------------|-----|--------------------------------------------------------------------------------------------------------------------------------------------------------------------------------------------------------------|-------|
| <b>Results</b>           |     |                                                                                                                                                                                                              |       |
| Participants             | 13* | (a) Report numbers of individuals at each stage of study—eg numbers potentially eligible, examined for eligibility, confirmed eligible, included in the study, completing follow-up, and analysed            | 5     |
|                          |     | (b) Give reasons for non-participation at each stage                                                                                                                                                         | 5     |
|                          |     | (c) Consider use of a flow diagram                                                                                                                                                                           | /     |
| Descriptive data         | 14* | (a) Give characteristics of study participants (eg demographic, clinical, social) and information on exposures and potential confounders                                                                     | 5     |
|                          |     | (b) Indicate number of participants with missing data for each variable of interest                                                                                                                          | 14-16 |
|                          |     | (c) Summarise follow-up time (eg, average and total amount)                                                                                                                                                  | /     |
| Outcome data             | 15* | Report numbers of outcome events or summary measures over time                                                                                                                                               | 5-6   |
| Main results             | 16  | (a) Give unadjusted estimates and, if applicable, confounder-adjusted estimates and their precision (eg, 95% confidence interval). Make clear which confounders were adjusted for and why they were included | 14-15 |
|                          |     | (b) Report category boundaries when continuous variables were categorized                                                                                                                                    | 4-5   |
|                          |     | (c) If relevant, consider translating estimates of relative risk into absolute risk for a meaningful time period                                                                                             |       |
| Other analyses           | 17  | Report other analyses done—eg analyses of subgroups and interactions, and sensitivity analyses                                                                                                               | 6     |
| <b>Discussion</b>        |     |                                                                                                                                                                                                              |       |
| Key results              | 18  | Summarise key results with reference to study objectives                                                                                                                                                     | 7     |
| Limitations              | 19  | Discuss limitations of the study, taking into account sources of potential bias or imprecision. Discuss both direction and magnitude of any potential bias                                                   | 9     |
| Interpretation           | 20  | Give a cautious overall interpretation of results considering objectives, limitations, multiplicity of analyses, results from similar studies, and other relevant evidence                                   | 7-9   |
| Generalisability         | 21  | Discuss the generalisability (external validity) of the study results                                                                                                                                        | 9     |
| <b>Other information</b> |     |                                                                                                                                                                                                              |       |
| Funding                  | 22  | Give the source of funding and the role of the funders for the present study and, if applicable, for the original study on which the present article is based                                                | 11    |

\*Give information separately for exposed and unexposed groups.

**Table S1:** Variable selection for PCS score mapping.

| No. | Complex PCS                      | Description PCS                                | Symptom                                                                       | Query    | Form    | Variables                                                |
|-----|----------------------------------|------------------------------------------------|-------------------------------------------------------------------------------|----------|---------|----------------------------------------------------------|
| 1   | <b>Chemosensory deficits</b>     | Smelling disturbance, impaired sense of taste  | Taste disorders                                                               | Symptoms | fv3_3   | gec_sy_ne_taste                                          |
|     |                                  |                                                | Odor disorders                                                                | Symptoms | fv3_3   | gec_sy_ne_smell                                          |
| 2   | <b>Fatigue</b>                   | Fatigue                                        | Fatigue (“Fatigue”)                                                           | Symptoms | esyoth  | sy_oth_icd11name                                         |
|     |                                  |                                                | Chronic Fatigue Syndrome ( <i>Persistent or frequent fatigue</i> )            | PROM     | prom    | cfs                                                      |
|     |                                  |                                                | Chalder Fatigue Scale                                                         | PROM     | promext | cfs_seid_1 to cfs_seid_13                                |
|     |                                  |                                                | PROMIS 29 – Fatigue                                                           | PROM     | promext | pro_29_hi7, pro_29_an3, pro_29_fatexp41, pro_29_fatexp40 |
| 3   | <b>Exercise intolerance</b>      | Shortness of breath, reduced exercise capacity | Dyspnea                                                                       | Symptoms | fv3_3   | gec_sy_pd_dysp                                           |
|     |                                  |                                                | Dyspnea (screening question)                                                  | PROM     | prom    | dysp                                                     |
|     |                                  |                                                | PROMIS Dyspnea                                                                | PROM     | promext | pro_dysfl001 to pro_dysfl10                              |
|     |                                  |                                                | Fatigue – diagnostic criteria ( <i>Feeling sick after physical exertion</i> ) | PROM     | promext | cfs_seid_crit2                                           |
| 4   | <b>Joint or muscle pain</b>      | Muscle pain, joint pain                        | Joint pain                                                                    | Symptoms | fv3_1   | sy_arthr                                                 |
|     |                                  |                                                | Muscle pain                                                                   | Symptoms | fv3_1   | sy_myalg                                                 |
| 5   | <b>Ear-nose-throat ailments</b>  | Hoarseness, sore throat, running nose          | Runny nose                                                                    | Symptoms | fv3_2   | sy_pd_rhin                                               |
|     |                                  |                                                | Nasal congestion                                                              | Symptoms | fv3_2   | sy_pd_stuf                                               |
|     |                                  |                                                | Sneezing                                                                      | Symptoms | fv3_2   | sy_pd_sneez                                              |
|     |                                  |                                                | Sore throat                                                                   | Symptoms | fv3_2   | sy_pd_sore                                               |
| 6   | <b>Coughing, wheezing</b>        | Coughing, wheezing                             | Coughing                                                                      | Symptoms | fv3_2   | gec_sy_pd_cough                                          |
|     |                                  |                                                | Wheezing                                                                      | Symptoms | fv3_2   | sy_pd_wheez                                              |
| 7   | <b>Chest pain</b>                | Chest pain                                     | Chest pain                                                                    | Symptoms | fv3_1   | sy_breastp                                               |
|     |                                  |                                                | Pain, location: chest                                                         | PROM     | prom    | pain_loc_chest                                           |
| 8   | <b>Gastrointestinal ailments</b> | Stomach pain, diarrhea, vomiting, nausea       | Stomach ache                                                                  | Symptoms | fv3_2   | gec_sy_gi_abdp                                           |
|     |                                  |                                                | Pain, location: abdomen                                                       | PROM     | prom    | pain_loc_abd                                             |
|     |                                  |                                                | Diarrhea                                                                      | Symptoms | fv3_2   | gec_sy_gi_diar                                           |
|     |                                  |                                                | Vomiting                                                                      | Symptoms | fv3_2   | gec_sy_gi_vom                                            |
|     |                                  |                                                | Nausea                                                                        | Symptoms | fv3_2   | gec_sy_gi_naus                                           |

**Table S1:** continued

| No. | Complex PCS                    | Description PCS                                                                                                                  | Symptom                                                                                               | Query    | Form    | Variables                                                               |
|-----|--------------------------------|----------------------------------------------------------------------------------------------------------------------------------|-------------------------------------------------------------------------------------------------------|----------|---------|-------------------------------------------------------------------------|
| 9   | <b>Neurological ailments</b>   | Confusion, vertigo, headache, motor deficits, sensory deficits, numbness, tremor, deficits of concentration, cognition or speech | Orientation disorder or confusion                                                                     | Symptoms | fv3_3   | gec_sy_ne_conf                                                          |
|     |                                |                                                                                                                                  | Cognitive impairments                                                                                 | Symptoms | Fv3_3   | sy_ne_cogn                                                              |
|     |                                |                                                                                                                                  | Fatigue - diagnostic criteria ( <i>Orthostatic intolerance - dizziness when standing up/walking</i> ) | PROM     | promext | cfs_seid_crit5                                                          |
|     |                                |                                                                                                                                  | Vertigo                                                                                               | Symptoms | fv3_1   | sy_dizzi                                                                |
|     |                                |                                                                                                                                  | Headache                                                                                              | Symptoms | fv3_1   | gec_sy_heada                                                            |
|     |                                |                                                                                                                                  | Pain, location: head                                                                                  | PROM     | prom    | pain_loc_head                                                           |
|     |                                |                                                                                                                                  | In the same area of the body: numbness (in case of pain)                                              | PROM     | promext | pain_dn2_6                                                              |
|     |                                |                                                                                                                                  | Fatigue - diagnostic criteria ( <i>cognitive (concentration or word-finding) disorders</i> )          | PROM     | promext | cfs_seid_crit4                                                          |
|     |                                |                                                                                                                                  | PROMIS cognitive function                                                                             | PROM     | prom    | pro_pc2r<br>pro_pc35r<br>pro_pc36r<br>pro_pc42r                         |
| 10  | <b>Dermatological ailments</b> | Hair loss, rash, itchiness                                                                                                       | Change in the skin or mucous membranes                                                                | Symptoms | fv3_1   | sy_skin                                                                 |
| 11  | <b>Infection signs</b>         | Chills, fever, general sickness/flu-like symptoms                                                                                | Feeling cold (“Chills”)                                                                               | Symptoms | esyoth  | sy_oth_icd1name                                                         |
|     |                                |                                                                                                                                  | Fever                                                                                                 | Symptoms | fv3_1   | gec_sy_fever                                                            |
|     |                                |                                                                                                                                  | Anorexia                                                                                              | Symptoms | fv3_1   | sy_appet                                                                |
|     |                                |                                                                                                                                  | Lymph node swelling                                                                                   | Symptoms | fv3_1   | sy_lymph                                                                |
|     |                                |                                                                                                                                  | General sickness/flu-like symptoms („Feeling ill“)                                                    | Symptoms | esyoth  | sy_oth_icd1name                                                         |
| 12  | <b>Sleep disturbance</b>       | Insomnia, unrestful sleep                                                                                                        | Sleep disturbance ( <i>„Sleep disturbance, not elsewhere classified“</i> )                            | Symptoms | esyoth  | sy_oth_icd1name                                                         |
|     |                                |                                                                                                                                  | PROMIS-29: Sleep disturbance                                                                          | PROM     | promext | pro_29_sleep109,<br>pro_29_sleep116, pro_29_sleep20,<br>pro_29_sleep44, |

The complete data dictionary is available in German [here](#).

**Table S2:** Post hoc test results for sex (male vs. female), smoker (yes or former vs. no), hospitalization (yes vs. no), administration to ICU (never vs. at least once), Vaccination against SARS-CoV-2 prior to study inclusion (yes vs. no).

|                                                                             | <b>p value</b>   |                   |                  |                   |                  |                     |
|-----------------------------------------------------------------------------|------------------|-------------------|------------------|-------------------|------------------|---------------------|
|                                                                             | PCC severity     |                   |                  |                   |                  |                     |
|                                                                             | None vs. mild    | None vs. moderate | None vs. severe  | Mild vs. moderate | Mild vs. severe  | Moderate vs. severe |
| <b>Age</b>                                                                  | .625             | .718              | .293             | .373              | .175             | .430                |
| <b>Sex</b>                                                                  | .192             | .078              | <b>&lt;.001*</b> | .972              | <b>.039*</b>     | <b>.032*</b>        |
| <b>Smoker</b>                                                               | .655             | .570              | .760             | >.999             | >.999            | >.999               |
| <b>Hospitalization</b>                                                      | .738             | <b>.004*</b>      | .164             | .051              | .314             | >.999               |
| <b>Admission to ICU</b>                                                     | .456             | .753              | .514             | .697              | .208             | .353                |
| <b>At least one vaccination against SARS-CoV-2 prior to study inclusion</b> | .132             | .366              | .156             | .496              | .816             | .403                |
| <b>All vaccinations against SARS-CoV-2 prior to study inclusion</b>         | <b>.019*</b>     | <b>.013*</b>      | .929             | .825              | .110             | .131                |
| <b>PROMIS-29 Ability to participate in social roles and activities</b>      | <b>.004*</b>     | <b>&lt;.001*</b>  | <b>&lt;.001*</b> | <b>&lt;.001*</b>  | <b>&lt;.001*</b> | .054                |
| <b>PROMIS-29 Physical Function</b>                                          | <b>&lt;.001*</b> | <b>&lt;.001*</b>  | <b>&lt;.001*</b> | <b>.001*</b>      | <b>.001*</b>     | .356                |

**Table S3:** Post hoc test results for comparison between PCC severity groups of age, BMI, number of comorbidities, PROMIS-29 Ability to participate in social roles and activities, PROMIS-29 physical function, number of vaccinations against SARS-CoV-2, EQ-5D-5L index and VAS at 3 and 12MFU, adjusted for multiple testing using Bonferroni correction.

|                                                                                                        | <b>p value</b>   | <b>power</b> |
|--------------------------------------------------------------------------------------------------------|------------------|--------------|
| <b>Difference in mean age between PCC groups</b>                                                       |                  |              |
| None vs. mild                                                                                          | .731             |              |
| None vs. moderate                                                                                      | .281             |              |
| None vs. severe                                                                                        | >.999            |              |
| Mild vs. moderate                                                                                      | >.999            |              |
| Mild vs. severe                                                                                        | >.999            |              |
| Moderate vs. severe                                                                                    | >.999            |              |
| <b>Difference in mean BMI between PCC groups</b>                                                       |                  |              |
| None vs. mild                                                                                          | >.999            |              |
| None vs. moderate                                                                                      | .442             |              |
| None vs. severe                                                                                        | .448             |              |
| Mild vs. moderate                                                                                      | .397             |              |
| Mild vs. severe                                                                                        | .361             |              |
| Moderate vs. severe                                                                                    | >.999            |              |
| <b>Difference in mean number of comorbidities between PCC groups</b>                                   |                  |              |
| None vs. mild                                                                                          | .095             |              |
| None vs. moderate                                                                                      | <b>.045*</b>     | .128         |
| None vs. severe                                                                                        | .263             |              |
| Mild vs. moderate                                                                                      | >.999            |              |
| Mild vs. severe                                                                                        | >.999            |              |
| Moderate vs. severe                                                                                    | >.999            |              |
| <b>Difference in mean of PROMIS-29 Ability to participate in social roles and activities sum score</b> |                  |              |
| <b>None vs. mild</b>                                                                                   | <b>&lt;.001*</b> | -.312        |
| <b>None vs. moderate</b>                                                                               | <b>&lt;.001*</b> | -.673        |
| <b>None vs. severe</b>                                                                                 | <b>&lt;.001*</b> | -.737        |
| <b>Mild vs. moderate</b>                                                                               | <b>&lt;.001*</b> | -.350        |
| <b>Mild vs. severe</b>                                                                                 | <b>&lt;.001*</b> | -.494        |
| <b>Moderate vs. severe</b>                                                                             | .431             |              |
| <b>Difference in mean of PROMIS-29 Physical function sum score</b>                                     |                  |              |
| <b>None vs. mild</b>                                                                                   | <b>&lt;.001*</b> | -.332        |
| <b>None vs. moderate</b>                                                                               | <b>&lt;.001*</b> | -.616        |
| <b>None vs. severe</b>                                                                                 | <b>&lt;.001*</b> | -.696        |
| <b>Mild vs. moderate</b>                                                                               | <b>&lt;.001*</b> | -.275        |
| <b>Mild vs. severe</b>                                                                                 | <b>&lt;.001*</b> | -.437        |
| <b>Moderate vs. severe</b>                                                                             | .235             |              |
| <b>Difference in mean of number of vaccinations against SARS-CoV-2</b>                                 |                  |              |
| None vs. mild                                                                                          | >.999            |              |
| None vs. moderate                                                                                      | >.999            |              |
| None vs. severe                                                                                        | >.999            |              |
| Mild vs. moderate                                                                                      | >.999            |              |
| Mild vs. severe                                                                                        | >.999            |              |
| Moderate vs. severe                                                                                    | >.999            |              |
| <b>Difference in mean of EQ-5D-5L Index at 3MFU</b>                                                    |                  |              |
| <b>None vs. mild</b>                                                                                   | <b>.006*</b>     | -.202        |
| <b>None vs. moderate</b>                                                                               | <b>&lt;.001*</b> | -.542        |
| <b>None vs. severe</b>                                                                                 | <b>&lt;.001*</b> | -.597        |
| <b>Mild vs. moderate</b>                                                                               | <b>&lt;.001*</b> | -.323        |
| <b>Mild vs. severe</b>                                                                                 | <b>&lt;.001*</b> | -.478        |
| <b>Moderate vs. severe</b>                                                                             | <b>.014*</b>     | -.146        |



**Table S3:** continued

|                                                      | <b>p value</b> | <b>power</b> |
|------------------------------------------------------|----------------|--------------|
| <b>Difference in mean of EQ-5D-5L VAS at 3MFU</b>    |                |              |
| None vs. mild                                        | <.001*         | -.280        |
| None vs. moderate                                    | <.001*         | -.557        |
| None vs. severe                                      | <.001*         | -.578        |
| Mild vs. moderate                                    | <.001*         | -.260        |
| Mild vs. severe                                      | <.001*         | -.385        |
| Moderate vs. severe                                  | .435           |              |
| <b>Difference in mean of EQ-5D-5L Index at 12MFU</b> |                |              |
| None vs. mild                                        | <.001*         | -.343        |
| None vs. moderate                                    | <.001*         | -.721        |
| None vs. severe                                      | <.001*         | -.719        |
| Mild vs. moderate                                    | <.001*         | -.358        |
| Mild vs. severe                                      | <.001*         | -.503        |
| Moderate vs. severe                                  | .327           |              |
| <b>Difference in mean of EQ-5D-5L VAS at 12MFU</b>   |                |              |
| None vs. mild                                        | .006*          | -.233        |
| None vs. moderate                                    | <.001*         | -.619        |
| None vs. severe                                      | <.001*         | -.612        |
| Mild vs. moderate                                    | <.001*         | -.367        |
| Mild vs. severe                                      | <.001*         | -.484        |
| Moderate vs. severe                                  | .668           |              |

**Table S4:** Post hoc test results for clinical severity (mild, moderate, severe) during acute infection.

| PCC severity               | p value                                  |                 |                    |
|----------------------------|------------------------------------------|-----------------|--------------------|
|                            | Clinical severity during acute infection |                 |                    |
|                            | Mild vs. moderate                        | Mild vs. severe | Moderate vs severe |
| <b>None vs. mild</b>       | .995                                     | .245            | .198               |
| <b>None vs. moderate</b>   | <b>.007*</b>                             | <b>.014*</b>    | .613               |
| <b>None vs. severe</b>     | .147                                     | .505            | .806               |
| <b>Mild vs. moderate</b>   | <b>.036*</b>                             | .402            | .439               |
| <b>Mild vs. severe</b>     | .214                                     | >.999           | .255               |
| <b>Moderate vs. severe</b> | >.999                                    | .763            | .530               |

**Table S5:** Post hoc test results for number of vaccinations against SARS-CoV-2 (0, 1, 2, 3 or more)

| PCC severity               | p value <sup>a</sup>                                   |              |          |         |          |          |
|----------------------------|--------------------------------------------------------|--------------|----------|---------|----------|----------|
|                            | Number of vaccinations against SARS-CoV-2 <sup>b</sup> |              |          |         |          |          |
|                            | 0 vs. 1                                                | 0 vs. 2      | 0 vs. 3+ | 1 vs. 2 | 1 vs. 3+ | 2 vs. 3+ |
| <b>None vs. mild</b>       | .438                                                   | .991         | .762     | .552    | .739     | .906     |
| <b>None vs. moderate</b>   | .353                                                   | .064         | .154     | .635    | .894     | .806     |
| <b>None vs. severe</b>     | .606                                                   | .181         | .325     | .749    | .984     | .941     |
| <b>Mild vs. moderate</b>   | >.999                                                  | .192         | .489     | .245    | .548     | .654     |
| <b>Mild vs. severe</b>     | .267                                                   | .187         | .231     | >.999   | >.999    | >.999    |
| <b>Moderate vs. severe</b> | .228                                                   | <b>.011*</b> | .050     | .503    | .852     | .782     |

**Table S6:** Group comparisons between PCC severity groups none, mild, moderate and severe stratified by sex and age groups.

| <b>Female</b>                                                   |             |        |             |        |                 |        |               |        |                            |                       |         |             |         |                 |         |               |         |                            |
|-----------------------------------------------------------------|-------------|--------|-------------|--------|-----------------|--------|---------------|--------|----------------------------|-----------------------|---------|-------------|---------|-----------------|---------|---------------|---------|----------------------------|
| <b>&lt; 65 years</b>                                            |             |        |             |        |                 |        |               |        |                            | <b>&gt;= 65 years</b> |         |             |         |                 |         |               |         |                            |
| <b>PCC Severity</b>                                             |             |        |             |        |                 |        |               |        |                            | <b>PCC Severity</b>   |         |             |         |                 |         |               |         |                            |
|                                                                 | <b>None</b> |        | <b>Mild</b> |        | <b>Moderate</b> |        | <b>Severe</b> |        | <b>p value<sup>a</sup></b> | <b>None</b>           |         | <b>Mild</b> |         | <b>Moderate</b> |         | <b>Severe</b> |         | <b>p value<sup>a</sup></b> |
| <b>n (%)</b>                                                    | 52          | (28.7) | 35          | (19.3) | 71              | (39.2) | 23            | (12.7) |                            | 18                    | (32.1)  | 13          | (23.2)  | 20              | (35.7)  | 5             | (9.0)   |                            |
| <b>BMI</b><br>[kg/m <sup>2</sup> ],<br>mean (SD) <sup>b,c</sup> | 26.7        | (6.9)  | 26.2        | (6.4)  | 29.3            | (8.0)  | 29.9          | (6.6)  | .052                       | 25.5                  | (6.3)   | 25.7        | (7.1)   | 26.6            | (4.4)   | 22.3          | (3.1)   | .377                       |
| <b>Smoker, n (%)<sup>b</sup></b>                                |             |        |             |        |                 |        |               |        |                            |                       |         |             |         |                 |         |               |         |                            |
| <b>Never</b>                                                    | 39          | (78.0) | 21          | (60.0) | 46              | (65.7) | 15            | (65.2) | .311                       | 8                     | (47.1)  | 10          | (76.9)  | 13              | (65.0)  | 2             | (40.0)  | .309                       |
| <b>Yes or former</b>                                            | 11          | (22.0) | 14          | (40.0) | 24              | (34.3) | 8             | (34.8) |                            | 9                     | (52.9)  | 3           | (23.1)  | 7               | (35.0)  | 3             | (60.0)  |                            |
| <b>Clinical Severity (following WHO criteria)<sup>b,f</sup></b> |             |        |             |        |                 |        |               |        |                            |                       |         |             |         |                 |         |               |         |                            |
| <b>Mild disease, n (%)</b>                                      | 20          | (38.5) | 12          | (35.3) | 12              | (16.9) | 2             | (8.7)  | .514                       | 1                     | (5.6)   | 0           |         | 0               |         | 0             |         | .162                       |
| <b>Moderate disease, n (%)</b>                                  | 28          | (53.8) | 19          | (55.9) | 54              | (76.1) | 19            | (82.6) |                            | 17                    | (94.4)  | 10          | (76.9)  | 16              | (80.0)  | 5             | (100.0) |                            |
| <b>Severe disease, n (%)</b>                                    | 4           | (7.7)  | 3           | (8.8)  | 5               | (7.0)  | 2             | (8.7)  |                            | 0                     |         | 3           | (23.1)  | 4               | (20.0)  | 0             |         |                            |
| <b>Hospitalized, n (%)<sup>b</sup></b>                          |             |        |             |        |                 |        |               |        |                            |                       |         |             |         |                 |         |               |         |                            |
| <b>No</b>                                                       | 20          | (38.5) | 12          | (35.3) | 12              | (16.9) | 2             | (8.7)  | .035*                      | 1                     | (5.6)   | 0           |         | 0               |         | 0             |         | .643                       |
| <b>Yes</b>                                                      | 32          | (61.5) | 22          | (64.7) | 59              | (83.1) | 21            | (91.3) |                            | 17                    | (94.4)  | 13          | (100.0) | 20              | (100.0) | 5             | (100.0) |                            |
| <b>Admission to intensive care unit (ICU)<sup>b</sup></b>       |             |        |             |        |                 |        |               |        |                            |                       |         |             |         |                 |         |               |         |                            |
| <b>Never, n (%)</b>                                             | 28          | (87.5) | 16          | (84.2) | 47              | (81.0) | 18            | (90.0) | .795                       | 17                    | (100.0) | 11          | (84.6)  | 17              | (85.0)  | 5             | (100.0) | .323                       |
| <b>At least once, n (%)</b>                                     | 4           | (12.5) | 3           | (15.8) | 11              | (19.0) | 2             | (10.0) |                            | 0                     |         | 2           | (15.4)  | 3               | (15.0)  | 0             |         |                            |
| <b>Male</b>                                                     |             |        |             |        |                 |        |               |        |                            |                       |         |             |         |                 |         |               |         |                            |
| <b>&lt; 65 years</b>                                            |             |        |             |        |                 |        |               |        |                            | <b>&gt;= 65 years</b> |         |             |         |                 |         |               |         |                            |
| <b>PCC Severity</b>                                             |             |        |             |        |                 |        |               |        |                            | <b>PCC Severity</b>   |         |             |         |                 |         |               |         |                            |
|                                                                 | <b>None</b> |        | <b>Mild</b> |        | <b>Moderate</b> |        | <b>Severe</b> |        | <b>p value<sup>a</sup></b> | <b>None</b>           |         | <b>Mild</b> |         | <b>Moderate</b> |         | <b>Severe</b> |         | <b>p value<sup>a</sup></b> |
| <b>n (%)</b>                                                    | 103         | (40.1) | 47          | (18.3) | 92              | (35.8) | 15            | (5.8)  |                            | 42                    | (39.3)  | 24          | (22.4)  | 37              | (34.6)  | 4             | (3.7)   |                            |

|                                                                 |      |       |      |       |      |       |      |       |      |      |       |      |       |      |       |      |       |      |
|-----------------------------------------------------------------|------|-------|------|-------|------|-------|------|-------|------|------|-------|------|-------|------|-------|------|-------|------|
| <b>BMI</b><br>[kg/m <sup>2</sup> ],<br>mean (SD) <sup>b,c</sup> | 28.4 | (5.4) | 28.1 | (5.9) | 28.1 | (4.3) | 29.5 | (4.5) | .573 | 26.8 | (6.1) | 27.9 | (4.6) | 28.2 | (6.5) | 27.3 | (4.1) | .452 |
|-----------------------------------------------------------------|------|-------|------|-------|------|-------|------|-------|------|------|-------|------|-------|------|-------|------|-------|------|

**Table S6:** continued

|                                                                | <b>Male</b>          |             |                 |               |                             |                       |             |                 |               |                             |        |    |        |    |        |   |         |      |
|----------------------------------------------------------------|----------------------|-------------|-----------------|---------------|-----------------------------|-----------------------|-------------|-----------------|---------------|-----------------------------|--------|----|--------|----|--------|---|---------|------|
|                                                                | <b>&lt; 65 years</b> |             |                 |               |                             | <b>&gt;= 65 years</b> |             |                 |               |                             |        |    |        |    |        |   |         |      |
|                                                                | <b>PCC Severity</b>  |             |                 |               |                             | <b>PCC Severity</b>   |             |                 |               |                             |        |    |        |    |        |   |         |      |
|                                                                | <b>None</b>          | <b>Mild</b> | <b>Moderate</b> | <b>Severe</b> | <b>p value <sup>a</sup></b> | <b>None</b>           | <b>Mild</b> | <b>Moderate</b> | <b>Severe</b> | <b>p value <sup>a</sup></b> |        |    |        |    |        |   |         |      |
| <b>Smoker, n (%) <sup>b</sup></b>                              |                      |             |                 |               |                             |                       |             |                 |               |                             |        |    |        |    |        |   |         |      |
| <b>Never</b>                                                   | 60                   | (59.4)      | 23              | (48.9)        | 51                          | (56.0)                | 7           | (46.7)          | .587          | 19                          | (50.0) | 14 | (60.9) | 16 | (43.2) | 3 | (75.0)  | .439 |
| <b>Yes or former</b>                                           | 41                   | (40.6)      | 24              | (51.1)        | 40                          | (44.0)                | 8           | (53.3)          |               | 19                          | (50.0) | 9  | (39.1) | 21 | (56.8) | 1 | (25.0)  |      |
| <b>Clinical Severity (following WHO criteria) <sup>b</sup></b> |                      |             |                 |               |                             |                       |             |                 |               |                             |        |    |        |    |        |   |         |      |
| <b>Mild disease, n (%) <sup>f</sup></b>                        | 27                   | (26.2)      | 11              | (23.4)        | 13                          | (14.4)                | 4           | (26.7)          | .327          | 2                           | (4.8)  | 2  | (8.3)  | 2  | (5.4)  | 0 |         | .973 |
| <b>Moderate disease, n (%)</b>                                 | 63                   | (61.2)      | 26              | (55.3)        | 59                          | (65.6)                | 8           | (53.3)          |               | 32                          | (76.2) | 17 | (70.9) | 28 | (75.7) | 4 | (100.0) |      |
| <b>Severe disease, n (%)</b>                                   | 13                   | (12.6)      | 10              | (21.3)        | 18                          | (20.0)                | 3           | (20.0)          |               | 8                           | (19.0) | 5  | (20.8) | 7  | (18.9) | 0 |         |      |
| <b>Hospitalized, n (%) <sup>b</sup></b>                        |                      |             |                 |               |                             |                       |             |                 |               |                             |        |    |        |    |        |   |         |      |
| <b>No</b>                                                      | 27                   | (26.2)      | 11              | (23.4)        | 13                          | (14.4)                | 4           | (26.7)          | .196          | 2                           | (4.8)  | 2  | (8.3)  | 2  | (5.4)  | 0 |         | .810 |
| <b>Yes</b>                                                     | 76                   | (73.8)      | 36              | (76.6)        | 77                          | (85.6)                | 11          | (73.3)          |               | 40                          | (95.2) | 22 | (91.7) | 35 | (94.6) | 4 | (100.0) |      |
| <b>Admission to intensive care unit (ICU) <sup>b</sup></b>     |                      |             |                 |               |                             |                       |             |                 |               |                             |        |    |        |    |        |   |         |      |
| <b>Never, n (%)</b>                                            | 60                   | (83.3)      | 26              | (74.3)        | 61                          | (80.3)                | 9           | (81.8)          | .733          | 30                          | (76.9) | 17 | (81.0) | 30 | (88.2) | 4 | (100.0) | .549 |
| <b>At least once, n (%)</b>                                    | 12                   | (16.7)      | 9               | (25.7)        | 15                          | (19.7)                | 2           | (18.2)          |               | 9                           | (23.1) | 4  | (19.0) | 4  | (11.9) | 0 |         |      |

<sup>a</sup> group differences assessed by Chi2, Fishers- or Kruskal-Wallis test, as appropriate; normally significant values were Bonferroni-adjusted by multiplication with the size of the respective group characteristics (i.e. 6 or 18), if the unadjusted p value already exceeded 0.050, no adjustment was done

<sup>b</sup> all analyses were conducted for patients with available data (female missing data <65 years/>=65 years: BMI 16/6, smoker 3/1, admission to ICU 44/2, clinical severity 1/0, vaccination against Sars-COV-2 21/5; male missing data <65 years/>=65 years: BMI 21/8, smoker 3/5, hospitalization 1/0, admission to ICU 54/4, clinical severity 2/0, vaccination against SaSARS-CoV-2 32/15, PROMIS-29 Ability to participate in social roles and activities 74/35, PROMIS-29 Physical Function 71/34)

**Table S7:** Post hoc test results for smoker (yes or former vs. no), hospitalization (yes vs. no), administration to ICU (never vs. at least once) stratified by sex and age groups.

| <b>Female</b>                    |                      |                      |                    |                      |                    |                        |                       |                      |                    |                      |                    |                        |
|----------------------------------|----------------------|----------------------|--------------------|----------------------|--------------------|------------------------|-----------------------|----------------------|--------------------|----------------------|--------------------|------------------------|
| <b>p value</b>                   |                      |                      |                    |                      |                    |                        |                       |                      |                    |                      |                    |                        |
|                                  | <b>&lt; 65 years</b> |                      |                    |                      |                    |                        | <b>&gt;= 65 years</b> |                      |                    |                      |                    |                        |
|                                  | <b>PCC severity</b>  |                      |                    |                      |                    |                        | <b>PCC severity</b>   |                      |                    |                      |                    |                        |
|                                  | None vs.<br>mild     | None vs.<br>moderate | None vs.<br>severe | Mild vs.<br>moderate | Mild vs.<br>severe | Moderate<br>vs. severe | None vs.<br>mild      | None vs.<br>moderate | None vs.<br>severe | Mild vs.<br>moderate | Mild vs.<br>severe | Moderate<br>vs. severe |
| <b>Smoker</b>                    | .121                 | .209                 | .385               | .720                 | .901               | >.999                  | .201                  | .444                 | >.999              | .701                 | .268               | .358                   |
| <b>Hospitalization</b>           | .945                 | <b>.013*</b>         | <b>.020*</b>       | .064                 | <b>.048*</b>       | .505                   | >.999                 | .474                 | >.999              | -                    | -                  | -                      |
| <b>Administration to<br/>ICU</b> | >.999                | .622                 | >.999              | >.999                | .661               | .496                   | .179                  | .234                 | -                  | >.999                | >.999              | >.999                  |
| <b>Male</b>                      |                      |                      |                    |                      |                    |                        |                       |                      |                    |                      |                    |                        |
| <b>p value</b>                   |                      |                      |                    |                      |                    |                        |                       |                      |                    |                      |                    |                        |
|                                  | <b>&lt; 65 years</b> |                      |                    |                      |                    |                        | <b>&gt;= 65 years</b> |                      |                    |                      |                    |                        |
|                                  | <b>PCC severity</b>  |                      |                    |                      |                    |                        | <b>PCC severity</b>   |                      |                    |                      |                    |                        |
|                                  | None vs.<br>mild     | None vs.<br>moderate | None vs.<br>severe | Mild vs.<br>moderate | Mild vs.<br>severe | Moderate<br>vs. severe | None vs.<br>mild      | None vs.<br>moderate | None vs.<br>severe | Mild vs.<br>moderate | Mild vs.<br>severe | Moderate<br>vs. severe |
| <b>Smoker</b>                    | .309                 | .745                 | .514               | .540                 | >.999              | .692                   | .575                  | .723                 | .608               | .288                 | >.999              | .321                   |
| <b>Hospitalization</b>           | .869                 | .067                 | >.999              | .283                 | >.999              | .259                   | .618                  | >.999                | >.999              | .643                 | >.999              | >.999                  |
| <b>Administration to<br/>ICU</b> | .398                 | .787                 | >.999              | .644                 | >.999              | >.999                  | >.999                 | .340                 | .564               | .464                 | >.999              | >.999                  |

**Table S8:** Correlations with Post-COVID-Sum-Score.

|                                                                              | Total  |                  | Female     |                  |            |              | Male         |                  |            |                  |   |
|------------------------------------------------------------------------------|--------|------------------|------------|------------------|------------|--------------|--------------|------------------|------------|------------------|---|
|                                                                              |        |                  | < 65 years |                  | ≥ 65 years |              | < 65 years   |                  | ≥ 65 years |                  |   |
|                                                                              | rho    | p value          | rho        | p value          | rho        | p value      | rho          | p value          | rho        | p value          |   |
| Age                                                                          | 0.072  | .077             | -          | -                | -          | -            | -            | -                | -          | -                | - |
| BMI                                                                          | 0.121  | <b>.004*</b>     | 0.249      | <b>.001*</b>     | 0.023      | .875         | 0.036        | .584             | 0.196      | .054             |   |
| Clinical Severity                                                            | 0.104  | <b>.011*</b>     | 0.226      | <b>.002*</b>     | 0.244      | .070         | 0.106        | .090             | -0.017     | .861             |   |
| Number of pre-existing comorbidities                                         | 0.116  | <b>.004*</b>     | 0.092      | .216             | 0.093      | .494         | 0.170        | <b>.006*</b>     | 0.229      | <b>.018*</b>     |   |
| Number of vaccinations against SARS-CoV-2                                    | 0.036  | .393             | -0.042     | .588             | 0.252      | .069         | <b>0.009</b> | <b>.890</b>      | 0.117      | <b>.254</b>      |   |
| Quality of Life (EQ-5D-5L) at 3MFU                                           |        |                  |            |                  |            |              |              |                  |            |                  |   |
| Index                                                                        | -0.558 | <b>&lt;.001*</b> | -0.686     | <b>&lt;.001*</b> | -0.277     | .068         | -0.551       | <b>&lt;.001*</b> | -0.428     | <b>&lt;.001*</b> |   |
| VAS                                                                          | -0.531 | <b>&lt;.001*</b> | -0.598     | <b>&lt;.001*</b> | -0.278     | .065         | -0.554       | <b>&lt;.001*</b> | -0.555     | <b>&lt;.001*</b> |   |
| Quality of Life (EQ-5D-5L) at 12MFU                                          |        |                  |            |                  |            |              |              |                  |            |                  |   |
| Index                                                                        | -0.691 | <b>&lt;.001*</b> | -0.756     | <b>&lt;.001*</b> | -0.244     | .179         | -0.698       | <b>&lt;.001*</b> | -0.714     | <b>&lt;.001*</b> |   |
| VAS                                                                          | -0.594 | <b>&lt;.001*</b> | -0.592     | <b>&lt;.001*</b> | -0.416     | <b>.018*</b> | -0.602       | <b>&lt;.001*</b> | -0.743     | <b>&lt;.001*</b> |   |
| PROMIS-29 Ability to participate in social roles and activities <sup>1</sup> | -0.635 | <b>&lt;.001*</b> | -0.668     | <b>&lt;.001*</b> | -0.414     | <b>.018*</b> | -0.688       | <b>&lt;.001*</b> | -0.520     | <b>&lt;.001*</b> |   |
| PROMIS-29 Physical function <sup>1</sup>                                     | -0,593 | <b>&lt;.001*</b> | -0.646     | <b>&lt;.001*</b> | -0.466     | <b>.006*</b> | -0.607       | <b>&lt;.001*</b> | -0.520     | <b>&lt;.001*</b> |   |

<sup>1</sup> the lower the sum score, the higher the social or functional impairments

**Table S9:** Patient characteristics of patients with changed PCS from 3 to 12MFU.

|                                                                   | Worse PCS |        | No shift in PCS |        | Better PCS |        |
|-------------------------------------------------------------------|-----------|--------|-----------------|--------|------------|--------|
|                                                                   | 73        | (12.1) | 232             | (38.5) | 85         | (14.1) |
| <b>Sex, <i>n</i> (%)</b>                                          |           |        |                 |        |            |        |
| <b>Women</b>                                                      | 29        | (39.7) | 96              | (41.6) | 31         | (36.5) |
| <b>Men</b>                                                        | 44        | (60.3) | 135             | (58.4) | 54         | (63.5) |
| <b>Age [years], <i>mean</i> (<i>SD</i>)</b>                       | 57.2      | (16.8) | 53.6            | (15.5) | 49.9       | (14.6) |
| <b>Age groups, <i>n</i> (%)</b>                                   |           |        |                 |        |            |        |
| < 65 years                                                        | 45        | (61.6) | 174             | (75.7) | 69         | (81.2) |
| ≥ 65 years                                                        | 28        | (38.4) | 56              | (24.3) | 16         | (18.8) |
| <b>Pre-existing comorbidities, <i>n</i> (%)</b>                   |           |        |                 |        |            |        |
| <b>Cardiovascular diseases</b>                                    | 38        | (52.1) | 109             | (47.0) | 29         | (34.1) |
| <b>Diabetes</b>                                                   | 15        | (20.5) | 40              | (17.3) | 9          | (10.6) |
| <b>Cancer</b>                                                     | 15        | (20.5) | 29              | (12.6) | 8          | (9.4)  |
| <b>Nephrological diseases</b>                                     | 12        | (16.4) | 14              | (6.0)  | 10         | (11.8) |
| <b>Allergies</b>                                                  | 11        | (15.3) | 39              | (16.9) | 16         | (18.8) |
| <b>Respiratory diseases</b>                                       | 7         | (9.6)  | 27              | (11.6) | 15         | (17.6) |
| <b>Gastrointestinal or hepatic diseases</b>                       | 6         | (8.2)  | 18              | (7.8)  | 3          | (3.5)  |
| <b>Psychiatric diseases</b>                                       | 4         | (5.5)  | 11              | (4.7)  | 3          | (3.5)  |
| <b>Organ transplant</b>                                           | 3         | (4.1)  | 9               | (3.4)  | 5          | (5.9)  |
| <b>Neurological diseases</b>                                      | 2         | (2.7)  | 7               | (3.0)  | 3          | (3.5)  |
| <b>Rheumatologic or immunologic diseases</b>                      | 1         | (1.4)  | 7               | (3.0)  | 2          | (2.4)  |
| <b>No. of pre-existing comorbidities, <i>Mean</i> (<i>SD</i>)</b> | 2.0       | (2.0)  | 1.7             | (1.8)  | 1.5        | (1.7)  |
| <b>0, <i>n</i> (%)</b>                                            | 19        | (26.0) | 68              | (29.3) | 31         | (36.5) |
| <b>1-2, <i>n</i> (%)</b>                                          | 30        | (41.1) | 105             | (45.3) | 36         | (42.4) |
| <b>3-5, <i>n</i> (%)</b>                                          | 18        | (24.7) | 47              | (20.3) | 14         | (16.5) |
| <b>6 or more, <i>n</i> (%)</b>                                    | 6         | (8.2)  | 12              | (5.2)  | 4          | (4.7)  |
| <b>No. of vaccinations per patient, <i>Mean</i> (<i>SD</i>)</b>   | 1.4       | (1.1)  | 1.5             | (1.1)  | 1.5        | (1.1)  |
| <b>0, <i>n</i> (%)<sup>b</sup></b>                                | 19        | (26.8) | 56              | (25.3) | 21         | (27.3) |
| <b>1, <i>n</i> (%)<sup>b</sup></b>                                | 18        | (25.4) | 40              | (18.1) | 13         | (16.9) |
| <b>2, <i>n</i> (%)<sup>b</sup></b>                                | 22        | (31.0) | 77              | (34.8) | 28         | (36.4) |
| <b>3 or more, <i>n</i> (%)<sup>b</sup></b>                        | 12        | (16.9) | 48              | (21.7) | 15         | (19.5) |



**Table S10:** Symptom complexes with symptoms present for at least two months at 12MFU visit following the recommendations by Bahmer et al. (2022)

| No. | Symptom complex                                       | Self-reported sub-symptoms                                        | Without PROMs |        | With PROMs |        |
|-----|-------------------------------------------------------|-------------------------------------------------------------------|---------------|--------|------------|--------|
|     |                                                       |                                                                   | n             | (%)    | n          | (%)    |
| 1   | <b>Chemosensory deficits</b> <sup>a, b</sup>          | Smelling disturbance, impaired sense of taste                     | 45            | (8.4)  | 45         | (8.4)  |
| 2   | <b>Fatigue</b> <sup>b</sup>                           | Fatigue                                                           | 52            | (9.2)  | 244        | (42.6) |
| 3   | <b>Exercise intolerance</b>                           | Shortness of breath                                               | 96            | (19.0) | 205        | (39.0) |
| 4   | <b>Joint or muscle pain</b> <sup>a, b</sup>           | Muscle pain, joint pain                                           | 39            | (7.4)  | 39         | (7.4)  |
| 5   | <b>Ear-Nose-Throat (ENT) ailments</b> <sup>a, b</sup> | Sneezing, sore throat, running nose, stuffy nose                  | 16            | (3.0)  | 16         | (3.0)  |
| 6   | <b>Coughing, wheezing</b> <sup>a, b</sup>             | Coughing, wheezing                                                | 35            | (6.5)  | 35         | (6.5)  |
| 7   | <b>Chest pain</b> <sup>b</sup>                        | Chest pain                                                        | 11            | (2.1)  | 63         | (11.9) |
| 8   | <b>Gastrointestinal ailments</b> <sup>b</sup>         | Stomach pain, diarrhea, vomiting, nausea                          | 11            | (2.0)  | 51         | (9.0)  |
| 9   | <b>Neurological ailments</b> <sup>b</sup>             | Confusion, vertigo, headache, deficits of cognition               | 77            | (14.0) | 244        | (43.3) |
| 10  | <b>Dermatological ailments</b> <sup>a, b</sup>        | Skin or mucous membrane change                                    | 7             | (1.3)  | 7          | (1.3)  |
| 11  | <b>Infection signs</b> <sup>a, b</sup>                | Chills, fever, feeling ill, lymph node swelling, loss of appetite | 14            | (2.5)  | 14         | (2.5)  |
| 12  | <b>Sleep disturbance</b> <sup>b</sup>                 | Sleep disturbance, not elsewhere classified                       | 0             | -      | 78         | (13.4) |

<sup>a</sup> no adjustment with patient reported outcome measures (PROMs)

<sup>b</sup> percentages relate to number of patients with available data (missing data: chemosensory deficits 50, Fatigue without/with PROMs 17/12, exercise and intolerance without/with PROMs 81/59, joint or muscle pain 57, ENT ailments 48, coughing/wheezing 43, chest pain without/with PROMs 63/57, gastrointestinal ailments without/with PROMs 21/20, neurological ailments without/with PROMs 36/22, dermatological ailments 53, infection signs 21, sleep disturbance without/with PROMs 2/2)

**Table S11:** Connection between social or functional impairments and pre-existing comorbidities for patients with no Post-COVID.

| Pre-existing comorbidities, <i>n</i> (%) <sup>b</sup> | PCC severity = "None" |                                                                              |             |                                          |             |
|-------------------------------------------------------|-----------------------|------------------------------------------------------------------------------|-------------|------------------------------------------|-------------|
|                                                       | Total                 | PROMIS-29 Ability to participate in social roles and activities <sup>a</sup> |             | PROMIS-29 Physical Function <sup>a</sup> |             |
|                                                       |                       | No impairments                                                               | Impairments | No impairments                           | Impairments |
| <b>854</b>                                            | 113 (13.2)            | 2 (0.23)                                                                     | 111 (13.0)  | 8 (0.94)                                 |             |
| <b>Respiratory diseases</b>                           | 10 (4.7)              | 2 (1.8)                                                                      | 0           | 2 (1.8)                                  | 0           |
| <b>Cardiovascular diseases</b>                        | 94 (43.7)             | 42 (37.2)                                                                    | 2 (100.0)   | 40 (36.0)                                | 6 (75.0)    |
| <b>Neurological diseases</b>                          | 7 (3.3)               | 2 (1.8)                                                                      | 0           | 2 (1.8)                                  | 0           |
| <b>Psychiatric diseases</b>                           | 7 (3.3)               | 2 (1.8)                                                                      | 0           | 2 (1.8)                                  | 0           |
| <b>Gastrointestinal or hepatic diseases</b>           | 11 (5.1)              | 5 (4.4)                                                                      | 0           | 7 (6.3)                                  | 0           |
| <b>Diabetes</b>                                       | 29 (13.5)             | 14 (12.4)                                                                    | 0           | 14 (12.6)                                | 2 (25.0)    |
| <b>Rheumatologic or immunologic diseases</b>          | 1 (0.5)               | 1 (0.9)                                                                      | 0           | 1 (0.9)                                  | 0           |
| <b>Nephrological diseases</b>                         | 19 (8.8)              | 8 (7.1)                                                                      | 1 (50.0)    | 8 (7.2)                                  | 2 (25.0)    |
| <b>Allergies<sup>j</sup></b>                          | 29 (13.5)             | 20 (17.7)                                                                    | 0           | 19 (17.1)                                | 1 (12.5)    |
| <b>Cancer<sup>j</sup></b>                             | 35 (16.3)             | 13 (11.5)                                                                    | 1 (50.0)    | 13 (11.7)                                | 2 (25.0)    |
| <b>Organ transplant<sup>j</sup></b>                   | 14 (6.5)              | 7 (6.2)                                                                      | 0           | 7 (6.3)                                  | 1 (12.5)    |

<sup>a</sup> all analyses were conducted for patients with available data (missing data: PROMIS-29 ability to participate in social roles and activities 172, PROMIS-29 Physical Function 166)

<sup>b</sup> all analyses were conducted for patients with available data (missing data: psychiatric diseases 1, diabetes 3, allergies 6, cancer 4)

**Table S12:** Sensitivity analysis treating a missing in a symptom complex as 0 points: Group comparisons between PCC severity groups none, mild, moderate and severe.

|                                                                                                            | PCC-Score <sup>a</sup> |                        |                                |                    | p value <sup>c</sup> |          |
|------------------------------------------------------------------------------------------------------------|------------------------|------------------------|--------------------------------|--------------------|----------------------|----------|
|                                                                                                            | 0<br>(none)            | >0 to ≤10.75<br>(mild) | >10.75 to ≤26.25<br>(moderate) | >26.25<br>(severe) | unadjusted           | adjusted |
| <b>n (%)</b>                                                                                               | 318 (37.2)             | 173 (20.3)             | 301 (35.2)                     | 62 (7.3)           |                      |          |
| <b>Age [years], Mean (SD) <sup>b,d</sup></b>                                                               | 52.6 (17.1)            | 55.3 (16.7)            | 54.7 (14.9)                    | 53.4 (13.8)        | .218                 | n.a      |
| <b>Age groups, n (%) <sup>b,d</sup></b>                                                                    |                        |                        |                                |                    |                      |          |
| < 65 years                                                                                                 | 226 (71.1)             | 122 (70.9)             | 224 (74.7)                     | 51 (82.3)          | .251                 | n.a      |
| ≥ 65 years                                                                                                 | 92 (28.9)              | 51 (29.1)              | 76 (25.3)                      | 11 (17.7)          |                      |          |
| <b>Sex n (%) <sup>b,d</sup></b>                                                                            |                        |                        |                                |                    |                      |          |
| <b>Women,</b>                                                                                              | 119 (37.4)             | 65 (37.8)              | 127 (42.2)                     | 35 (56.5)          | <b>.034*</b>         | .204     |
| <b>Men</b>                                                                                                 | 199 (62.6)             | 107 (62.2)             | 174 (57.8)                     | 27 (43.5)          |                      |          |
| <b>BMI [kg/m<sup>2</sup>], mean (SD) <sup>b,d</sup></b>                                                    | 27.6 (5.9)             | 28.2 (7.7)             | 28.4 (6.0)                     | 29.1 (6.0)         | .078                 | n.a      |
| <b>Smoker, n (%) <sup>b,d</sup></b>                                                                        |                        |                        |                                |                    |                      |          |
| <b>Never</b>                                                                                               | 179 (60.9)             | 100 (58.5)             | 166 (55.9)                     | 35 (56.5)          | .659                 | n.a      |
| <b>Yes or former</b>                                                                                       | 115 (39.1)             | 71 (41.5)              | 131 (44.1)                     | 27 (43.5)          |                      |          |
| <b>Clinical Severity (following WHO criteria) <sup>b,d</sup></b>                                           |                        |                        |                                |                    |                      |          |
| <b>Mild disease (no hospitalization), n (%)</b>                                                            | 64 (20.3)              | 31 (18.0)              | 35 (11.7)                      | 7 (11.3)           | <b>.026*</b>         | .466     |
| <b>Moderate disease (hospitalized, no oxygen or oxygen by mask or nasal prongs (&lt; 15 l/min)), n (%)</b> | 204 (64.6)             | 105 (61.0)             | 208 (69.8)                     | 48 (77.4)          |                      |          |
| <b>Severe disease (hospitalized, oxygen by NIV or high flow (&gt; 15 l/min)), n (%)</b>                    | 48 (15.2)              | 36 (20.9)              | 55 (18.5)                      | 7 (11.3)           |                      |          |
| <b>Hospitalized, n (%) <sup>b,d</sup></b>                                                                  |                        |                        |                                |                    |                      |          |
| <b>No</b>                                                                                                  | 64 (20.3)              | 31 (18.0)              | 35 (11.7)                      | 7 (11.3)           | <b>.021*</b>         | .126     |
| <b>Yes</b>                                                                                                 | 252 (79.7)             | 141 (82.0)             | 263 (88.3)                     | 55 (88.7)          |                      |          |
| <b>Admission to intensive care unit (ICU) <sup>b,d</sup></b>                                               |                        |                        |                                |                    |                      |          |
| <b>Never, n (%)</b>                                                                                        | 202 (82.1)             | 104 (76.5)             | 209 (80.7)                     | 46 (86.8)          | .369                 | n.a      |
| <b>At least once, n (%)</b>                                                                                | 44 (17.9)              | 32 (23.5)              | 50 (19.3)                      | 7 (13.2)           |                      |          |
| <b>Vaccination against SARS-CoV-2 prior to study inclusion <sup>b,c</sup></b>                              |                        |                        |                                |                    |                      |          |
| <b>No, n (%)</b>                                                                                           | 159 (57.8)             | 106 (67.5)             | 170 (60.7)                     | 35 (60.3)          | .262                 | n.a      |
| <b>Yes, n (%)</b>                                                                                          | 116 (42.2)             | 51 (32.5)              | 110 (39.3)                     | 23 (39.7)          |                      |          |
| <b>No. of pre-existing comorbidities, Mean (SD) <sup>b,d</sup></b>                                         | 1.6 (1.8)              | 2.0 (2.1)              | 2.0 (2.0)                      | 2.3 (2.3)          | .053                 | n.a      |
| <b>0, n (%)</b>                                                                                            | 106 (33.3)             | 56 (32.4)              | 83 (27.6)                      | 15 (24.2)          | .276                 | n.a      |
| <b>1 or more, n (%)</b>                                                                                    | 212 (66.7)             | 117 (67.6)             | 218 (72.4)                     | 47 (75.8)          |                      |          |

Table S12: continued

|                                                                                       | PCC-Score <sup>a</sup> |                        |                                |                    | p value <sup>c</sup> |                  |
|---------------------------------------------------------------------------------------|------------------------|------------------------|--------------------------------|--------------------|----------------------|------------------|
|                                                                                       | 0<br>(none)            | >0 to ≤10.75<br>(mild) | >10.75 to ≤26.25<br>(moderate) | >26.25<br>(severe) | unadjusted           | adjusted         |
| <b>Pre-existing comorbidities <i>n</i> (%) <sup>b,f</sup></b>                         |                        |                        |                                |                    |                      |                  |
| <b>Cardiovascular diseases</b>                                                        | 140 (44.0)             | 84 (48.6)              | 139 (46.2)                     | 26 (41.9)          | .729                 | n.a              |
| <b>Diabetes</b>                                                                       | 44 (14.0)              | 40 (23.3)              | 42 (14.0)                      | 11 (17.7)          | <b>.035*</b>         | .210             |
| <b>Cancer</b>                                                                         | 47 (15.0)              | 20 (11.6)              | 53 (17.7)                      | 15 (24.6)          | .083                 | n.a              |
| <b>Allergies</b>                                                                      | 43 (13.8)              | 26 (15.0)              | 45 (15.1)                      | 9 (14.5)           | .969                 | n.a              |
| <b>Respiratory diseases</b>                                                           | 24 (7.6)               | 21 (12.1)              | 52 (17.3)                      | 14 (22.6)          | <b>&lt;.001*</b>     | <b>.002*</b>     |
| <b>Nephrological diseases</b>                                                         | 28 (8.8)               | 19 (11.0)              | 32 (10.6)                      | 10 (16.1)          | .356                 | n.a              |
| <b>Gastrointestinal or hepatic diseases</b>                                           | 21 (6.6)               | 11 (6.4)               | 21 (7.0)                       | 6 (9.7)            | .794                 | n.a              |
| <b>Organ transplant</b>                                                               | 20 (6.3)               | 9 (5.2)                | 14 (4.7)                       | 4 (6.5)            | .773                 | n.a              |
| <b>Psychiatric diseases</b>                                                           | 11 (3.5)               | 5 (2.9)                | 26 (8.7)                       | 5 (8.3)            | <b>.009*</b>         | .055             |
| <b>Neurological diseases</b>                                                          | 12 (3.8)               | 8 (4.6)                | 11 (3.7)                       | 7 (11.3)           | .087                 | n.a              |
| <b>Rheumatologic or immunologic diseases</b>                                          | 5 (1.6)                | 4 (2.3)                | 17 (5.7)                       | 2 (3.2)            | <b>.033*</b>         | .200             |
| <b>PROMIS-29 Ability to participate in social roles and activities <sup>b,d</sup></b> | 18.9 (2.0)             | 16.9 (3.8)             | 13.1 (4.3)                     | 11.3 (3.9)         | <b>&lt;.001*</b>     | <b>&lt;.001*</b> |
| <b>No social impairments, <i>n</i> (%)</b>                                            | 144 (98.6)             | 104 (89.7)             | 128 (53.6)                     | 17 (32.7)          | <b>&lt;.001*</b>     | <b>&lt;.001*</b> |
| <b>Social impairments, <i>n</i> (%)</b>                                               | 2 (1.4)                | 12 (10.3)              | 111 (46.4)                     | 35 (67.3)          |                      |                  |
| <b>PROMIS-29 Physical function <sup>b,d</sup></b>                                     | 19.4 (1.6)             | 17.6 (3.5)             | 15.2 (4.2)                     | 13.7 (4.2)         | <b>&lt;.001*</b>     | <b>&lt;.001*</b> |
| <b>No physical impairments, <i>n</i> (%)</b>                                          | 140 (44.0)             | 81 (46.8)              | 93 (30.9)                      | 13 (21.0)          | <b>&lt;.001*</b>     | <b>&lt;.001*</b> |
| <b>Physical impairments, <i>n</i> (%)</b>                                             | 12 (3.8)               | 38 (22.0)              | 148 (49.2)                     | 38 (61.3)          |                      |                  |

<sup>a</sup> PCC-Groups including PROMs; missing values: 22; missings in symptom complexes were ignored (represented 0 points for the complex)

<sup>b</sup> all analyses were conducted for patients with available data (missing data by PCC-group: , age/age groups 2, sex: 1, BMI 82, smoker 30, clinical severity 6, hospitalization 6, admission to ICU 127, vaccination against SARS-CoV-2 prior to study inclusion 84, PROMIS-29 Ability to participate in social roles and activities 301, PROMIS-29 Physical function 291, diabetes 6, cancer 7, allergies 9, respiratory diseases 1, psychiatric diseases 5)

<sup>c</sup> group differences assessed by Chi2, Fishers- or Kruskal-Wallis test, as appropriate; normally significant values were Bonferroni-adjusted by multiplication with the size of the respective group characteristics (i.e. 6 or 18), n.a: not applicable because the unadjusted p value already exceeded 0.050

<sup>d</sup> for post-hoc test results see Figure 3 (age), Figure 4 (BMI), Table 4 (age groups (< or >= 65 years), sex, smoker, hospitalization, administration to ICU), Table 5 (clinical severity)

<sup>e</sup> “No” includes all patients without any SARS-CoV-2 vaccination

<sup>f</sup> pre-existing comorbidities were either diagnosed or not diagnosed

**Supplementary text 1: Version numbers of PROMs**

In the SUEP, PROMIS were assessed in the following versions: PROMIS-29 Fatigue 4a – Adult v1.0, PROMIS-29 Dyspnea Functional Limitations 10a – Adult v1.0, PROMIS Cognitive Function 4a – Adult v2.0, PROMIS-29 Sleep Disturbance 4a.
